# Supplementary material for: Comprehensive Pan-Cancer Analysis of IRAK Family Genes Identifies IRAK1 as a Novel Oncogene in Low-Grade Glioma
Source: Hindawi journal article supplement (doi:10.1155/2022/6497241), 2022-02-15

## Supplementary Fig. 1

Scatter plots for Spearman correlation tests between IRAK gene expression and DNAss, Immune score, Stromal score, and Estimate score in three histologic-based subtypes of LGG, including Astrocytoma (A), Oligodendroglioma (B), and mixed glioma (C).

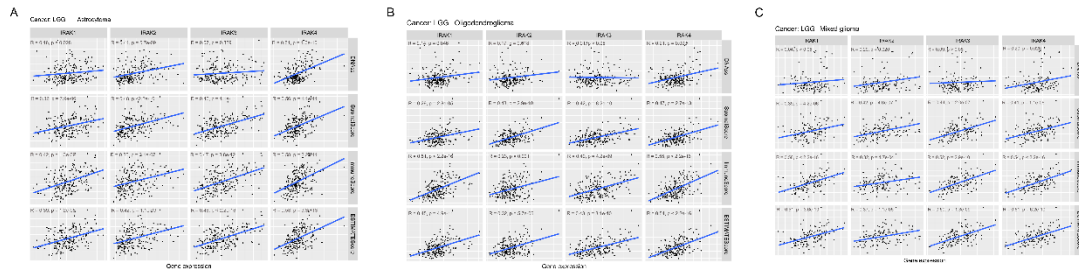

## Supplementary Fig. 2

Differential IRAK family gene expression across immune infiltrate subtypes in three histologic-based subgroups of LGG, including Astrocytoma (A), Oligodendroglioma (B), and mixed glioma (C). C3, inflammatory; C4, lymphocyte depleted; C5, immunologically quiet; C6, TGF- $\beta$  dominant. \*  $P < 0.05$ , \*\*  $P < 0.01$ , \*\*\*\*  $P < 0.0001$ .

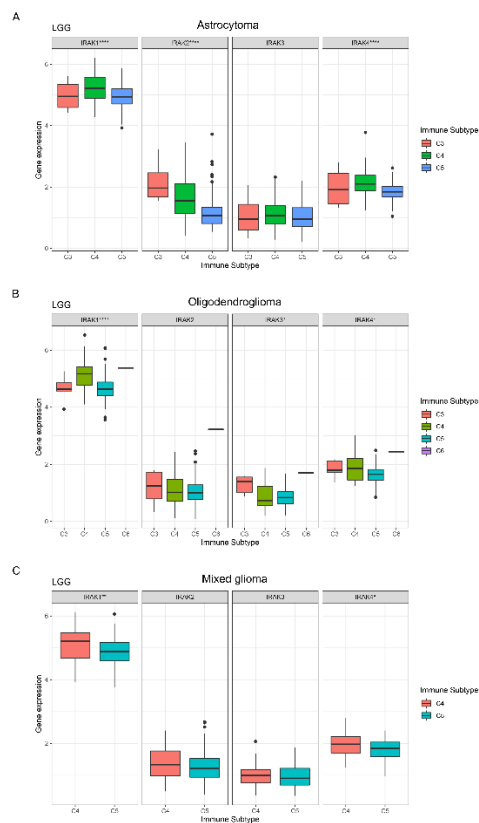

Supplementary Fig. S1 Full-size blots of Fig. 10A.

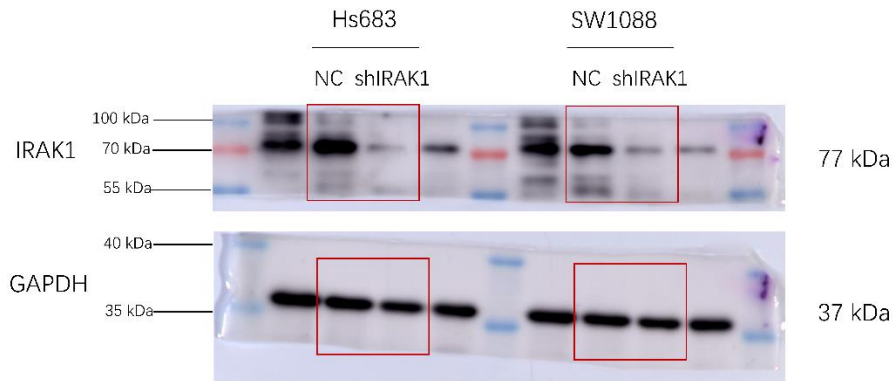

Supplementary Fig. S2 Full-size blots of Fig. 10G.

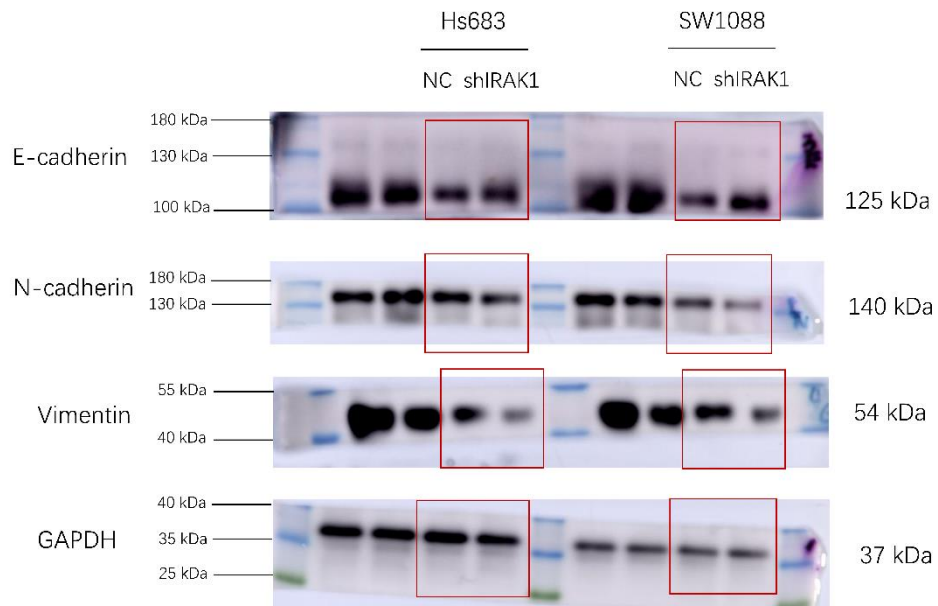

Supplement: f1 [file 6497241.f1.pdf]
